# Supplementary material
Source: PubMed Central journal article supplement (PMC6774922)

**Figure S1a**

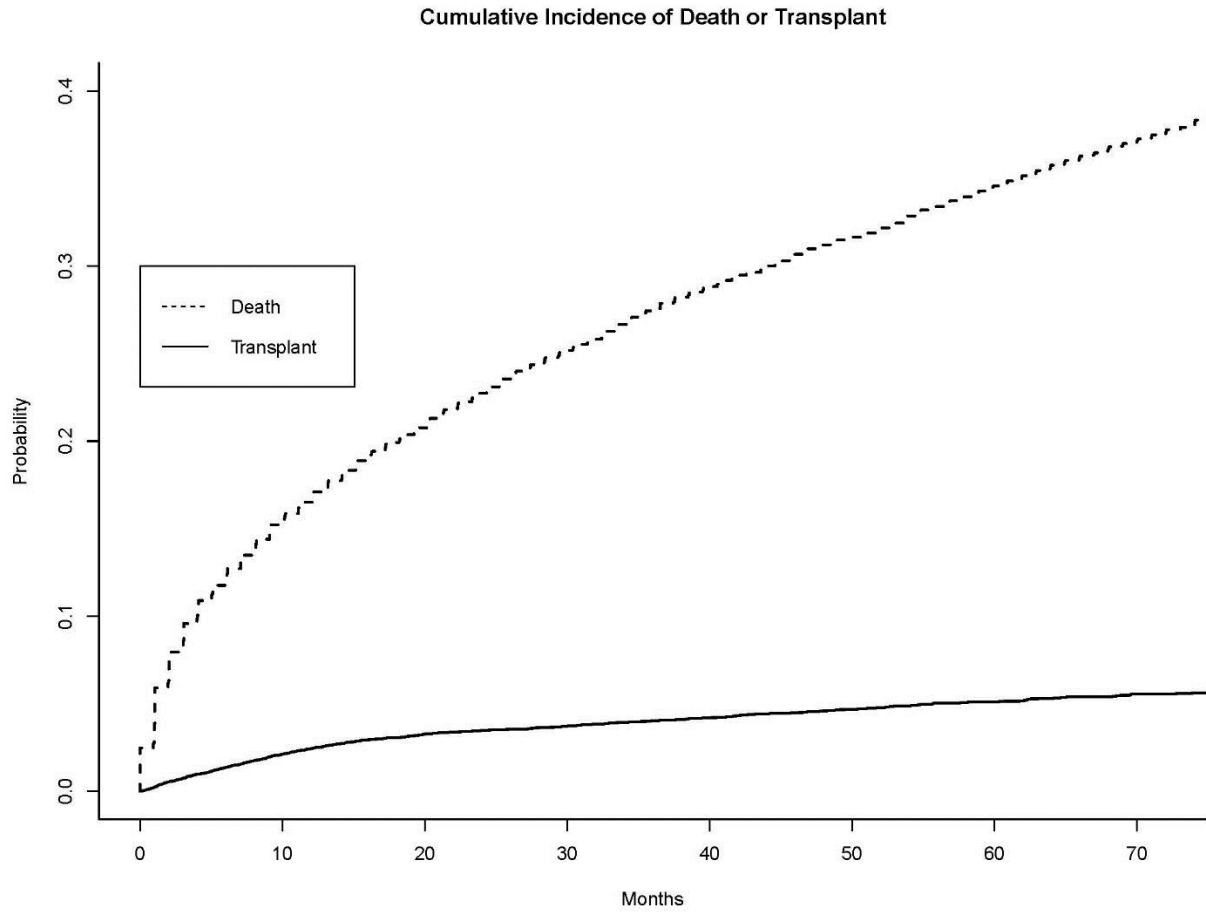

**Figure S2b**

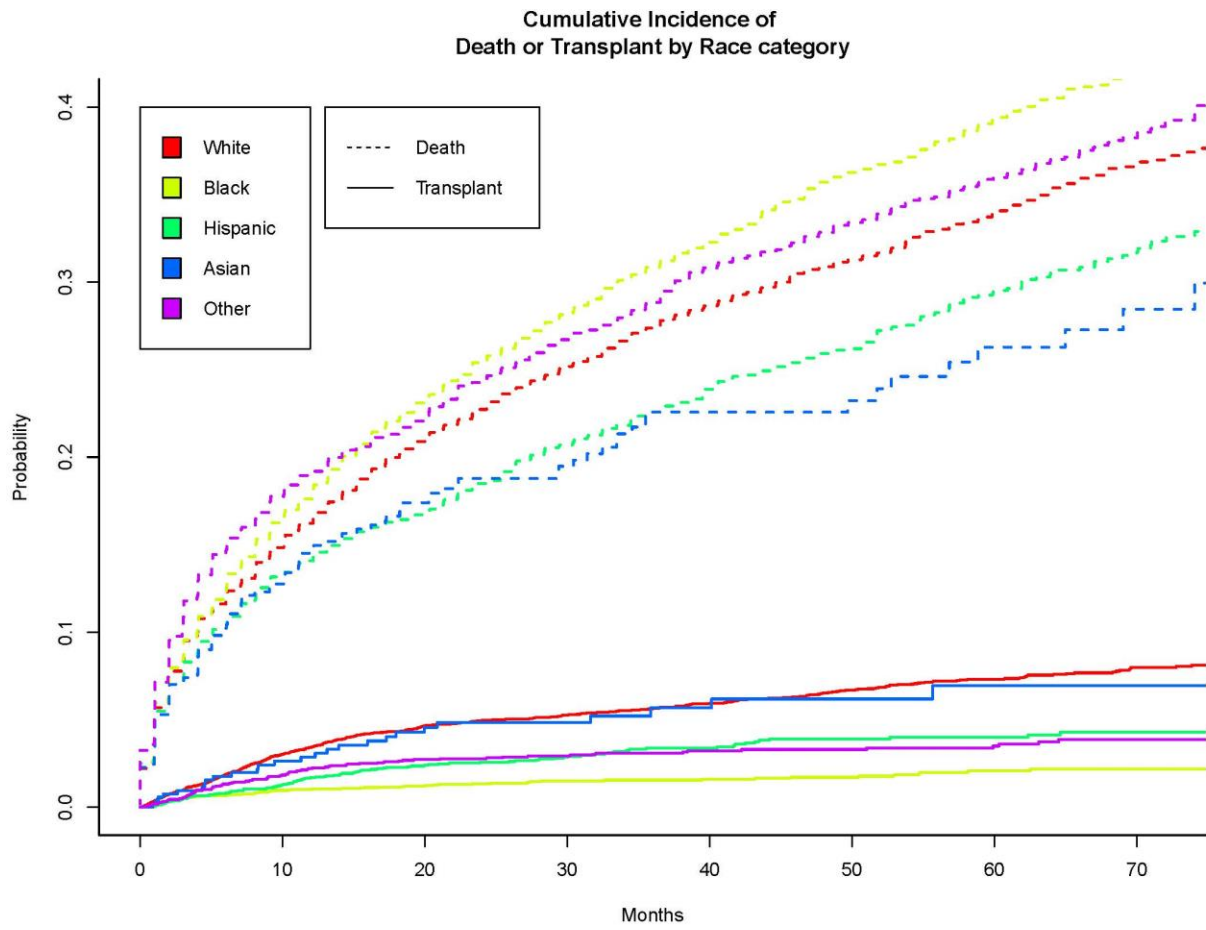

**Figure S2**

Adjusted Subdistribution Hazard Ratios of Death

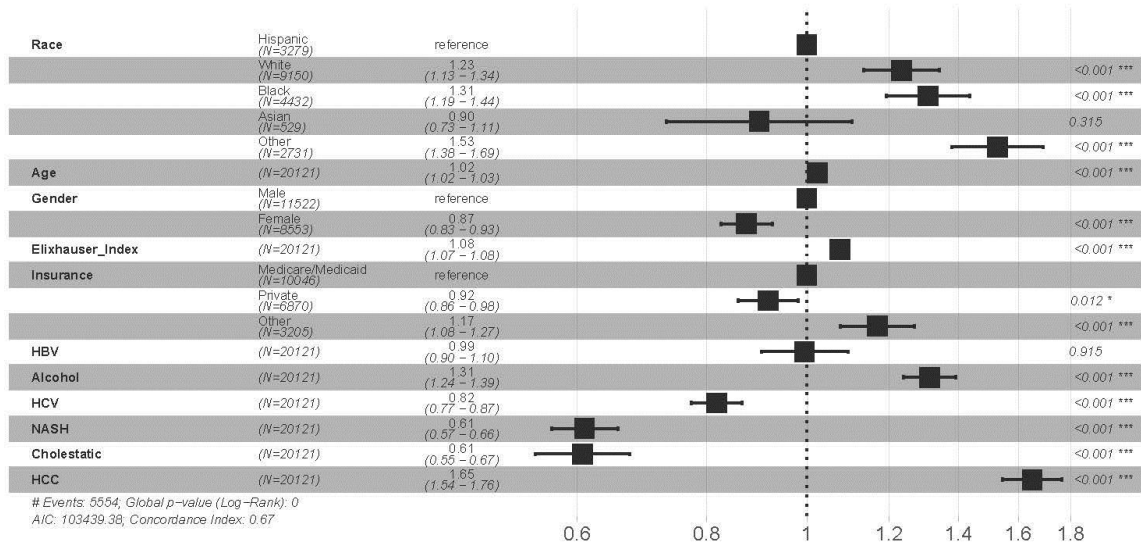

Supplement: NIHMS1525555-supplement-Supplemental_Digital_Content_to_Be_Published__cited_in_text_.pdf [file NIHMS1525555-supplement-Supplemental_Digital_Content_to_Be_Published__cited_in_text_.pdf]
